# Supplementary material
Source: PubMed Central journal article supplement (PMC6347543)
Supplement: NIHMS1504051-supplement-Suppl_1.pdf [file NIHMS1504051-supplement-Suppl_1.pdf]

# Kmeans clustering analysis

Helton et.al., 2018

## Install package dependencies

```
library(amide)  
library(ggfortify)  
library(ggplot2)  
library(misc3d)  
library(rgl)  
library(heatmap3)  
library(jamba)
```

## Import morphometric data and scale data per column

```
Data <- read.table("CA2_Morphometric_Data.txt", sep = "\t", header=TRUE)  
Data_scaled <- apply(Data[,-1], 2, function(i){i1<- scale(i, center=FALSE);  
i2 <-i1- mean(i1);})  
row.names(Data_scaled) <- makeNames(Data$Cell_Number)
```

## Visualize scaled data and cluster into 3 groups using rank-based distance

```
Hm <- heatmap.3(Data_scaled, FarbeLim=2, colLensFactor=5, RowvCutreeK = 3,  
distMethod="pearson",  
                  hclustfun = hclust, margins=c(15, 4), cexCol=0.8, cexRow=0.8,  
lhei=c(2.0,4.0),  
                  lwid=c(1.5,4.0), keysize=0.65, cex.key.main = 0.65);
```

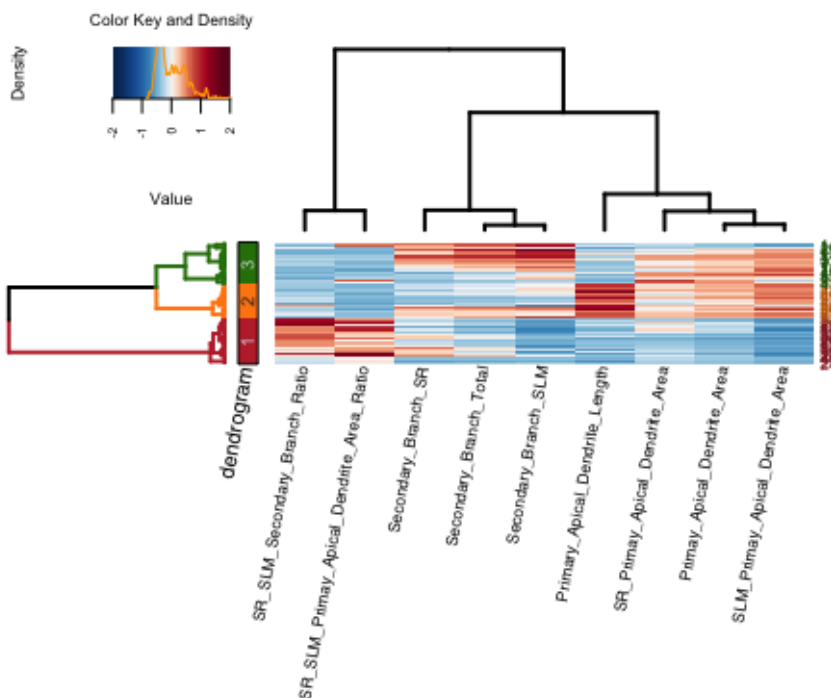

## Run Kmeans analysis

```
Data_scaled_df<- as.data.frame(Data_scaled);
Km <- Kmeans(Data_scaled_df[,c(1,4,5)], centers=3, nstart=20,
method="pearson")
Km

## K-means clustering with 3 clusters of sizes 16, 15, 24
##
## Cluster means:
##   Primary_Apical_Dendrite_Length Secondary_Branch_SLM
## 1                0.848                0.0461
## 2               -0.269                0.6811
## 3               -0.397               -0.4564
##   SR_SLM_Secondary_Branch_Ratio
## 1                -0.280
## 2                -0.395
## 3                 0.433
##
## Clustering vector:
##  7 30  5 42 16 32 19 44 45  4 20 36 27 35 21  3 12 18 37 14 26 29 13 23 10
##  2  3  2  1  2  3  3  1  1  3  3  3  3  3  2  2  3  3  2  3  3  2  3  2
## 28 50  1 15 51 17  6 55 39 31 52 46 11 33 38 34 24 54 43 25  9 41  8  2 48
##  3  1  2  2  1  2  2  1  3  3  1  1  2  3  1  3  3  1  1  3  2  1  2  3  1
## 49 40 47 53 22
##  1  3  1  1  3
##
## Within cluster sum of squares by cluster:
## [1] 0.000405 0.058811 0.040903
##
## Available components:
##
## [1] "cluster" "centers" "withinss" "size"
```

## Add Kmeans cluster column to color plots

```
Data_scaled_df$Cluster <- Km$cluster;
levels(Km$cluster) <- c("1","2","3")
col <- c("#FF8711FF", "#BF2D37FF" , "#2C7E0AFF")
table(Km$cluster, Data_scaled_df$Cluster)

##
##      1  2  3
## 1 16  0  0
## 2  0 15  0
## 3  0  0 24
```

## Plot some parameters

```
plot1<- plot(Data_scaled_df$Primary_Apical_Dendrite_Length,
             Data_scaled_df$SR_SLM_Secondary_Branch_Ratio,
             xlab = "Primary_Apical_Dendrite_Length", ylab =
"SR_SLM_Secondary_Branch_Ratio",
```

```
col=group2colors(Data_scaled_df$Cluster));
legend("topright", legend = paste("cluster", levels(Km$cluster)), col= col,
pch = 1)
```

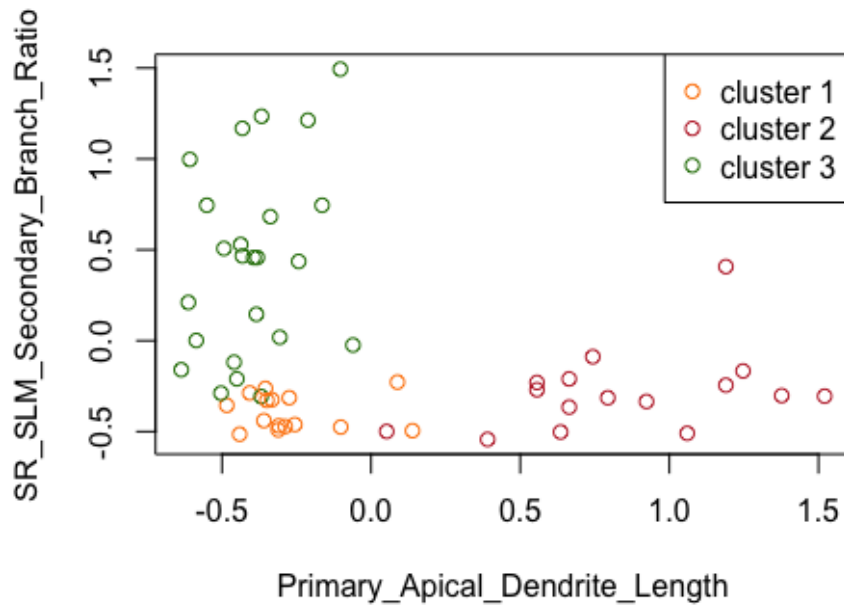

```
plot2 <- plot(Data_scaled_df$Primary_Apical_Dendrite_Length,
Data_scaled_df$Secondary_Branch_SLM,
xlab="Primary_Apical_Dendrite_Length",
ylab="Secondary_Branch_SLM",
col= group2colors(Data_scaled_df$Cluster));
legend("topright", legend = paste("cluster",
levels(Km$cluster)), col= col, pch = 1)
```

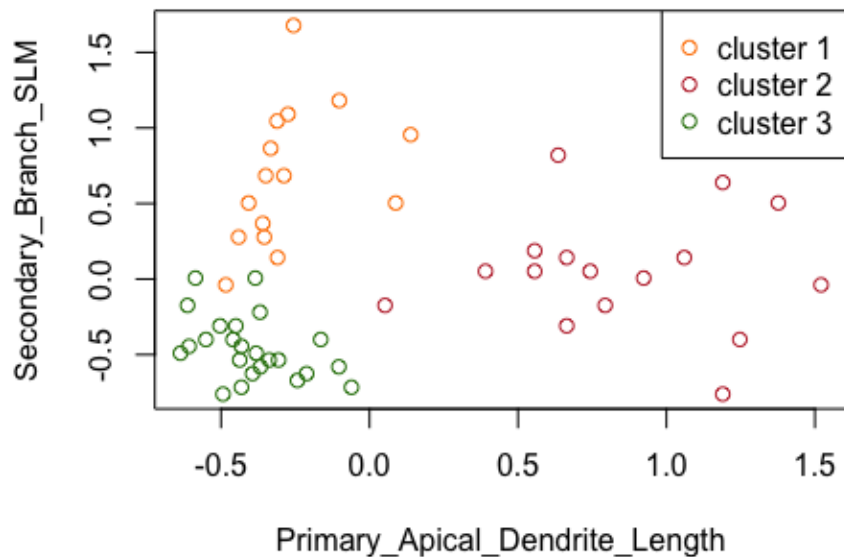

## PCA

```
pca <- pca(Data_scaled_df[,c(1,4,5)], center=TRUE, reduce=FALSE);
```

## Plot PCA colored by Kmeans cluster

```
scores <- pca$scores  
plot(scores[,1:2], col=Km$cluster, xlab = "Comp1", ylab = "Comp2",  
      xlim=c(-1.5,1.5), ylim=c(-1.5,1.5));  
      legend("bottomleft", col = levels(Km$cluster), legend = paste("cluster",  
levels(Km$cluster)),  
      pch = 1, cex = 1.0);
```

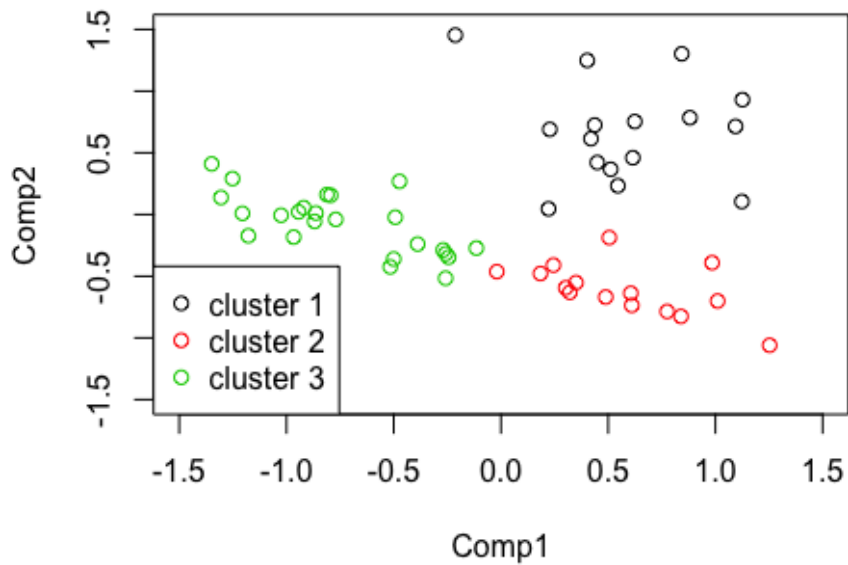

## 3D plot PCA with components colored by Kmeans cluster

```
plot3d(scores[,1:3], col = Km$cluster, size=7);
```

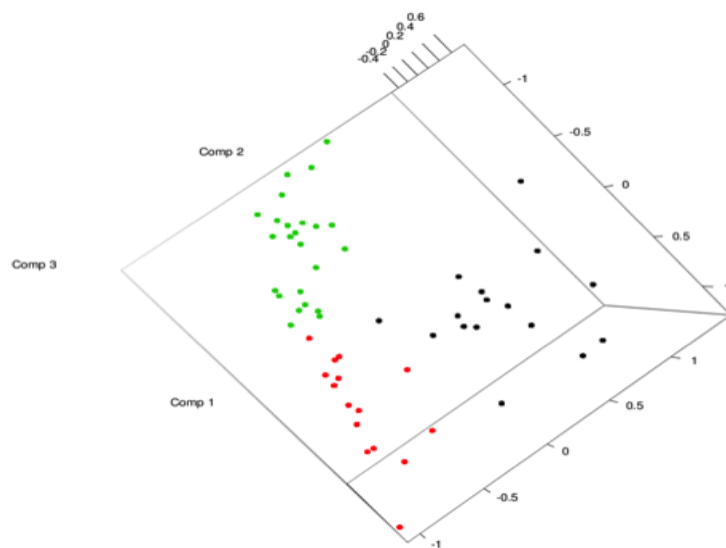

## Session Info

- R version 3.4.2 (2017-09-28)
- Platform: x86\_64-apple-darwin15.6.0 (64-bit)
- Running under: OS X El Capitan 10.11.6

| Attached base packages | Other attached packages |                    |
|------------------------|-------------------------|--------------------|
| stats                  | heatmap3_1.1.1          | jamba_0.0.5.900    |
| graphics               | lubridate_1.7.2         | rgl_0.98.1         |
| utils                  | colorspace_1.3-2        | misc3d_0.8-4       |
| methods                | dendextend_1.6.0        | ggfortify_0.4.1    |
| grDevices              | matrixStats_0.52.2      | ggplot2_2.2.1      |
| datasets               | gtools_3.5.0            | amap_0.8-14        |
| base                   | RColorBrewer_1.1-2      | fastcluster_1.1.24 |
