# Supplementary material
Source: PubMed Central journal article supplement (PMC6347543)
Supplement: NIHMS1504051-supplement-Suppl_2.pdf [file NIHMS1504051-supplement-Suppl_2.pdf]

## Kmeans supplemental data

Helton et.al., 2018

| 1  | 2     | 3   | 4  | 5  | 6          | 7        | 8          | 9          | 10         |
|----|-------|-----|----|----|------------|----------|------------|------------|------------|
| 7  | 53.2  | 66  | 37 | 29 | 1.27586207 | 34972.54 | 18185.7208 | 16786.8192 | 1.08333333 |
| 30 | 86.9  | 42  | 33 | 9  | 3.66666667 | 16487.24 | 12365.43   | 4121.81    | 3          |
| 5  | 42.5  | 36  | 19 | 17 | 1.11764706 | 51942.52 | 28048.9608 | 23893.5592 | 1.17391304 |
| 42 | 202   | 27  | 16 | 11 | 1.45454545 | 33841.64 | 16582.4036 | 17259.2364 | 0.96078431 |
| 16 | 95.6  | 81  | 37 | 44 | 0.84090909 | 16428.66 | 13471.5012 | 2957.1588  | 4.55555556 |
| 32 | 101.3 | 33  | 31 | 2  | 1.88561    | 17904.65 | 14502.7665 | 3401.8835  | 4.2631579  |
| 19 | 24.6  | 48  | 34 | 14 | 2.42857143 | 17998.64 | 14218.9256 | 3779.7144  | 3.76190476 |
| 44 | 321   | 38  | 21 | 17 | 1.23529412 | 38913.54 | 20624.1762 | 18289.3638 | 1.12765957 |
| 45 | 117   | 25  | 11 | 14 | 0.78571429 | 44098.42 | 26900.0362 | 17198.3838 | 1.56410256 |
| 4  | 58.5  | 29  | 16 | 13 | 1.23076923 | 44987.25 | 31940.9475 | 13046.3025 | 2.44827586 |
| 20 | 58.7  | 29  | 24 | 5  | 4.8        | 26914.28 | 23146.2808 | 3767.9992  | 6.14285714 |
| 36 | 67.2  | 50  | 44 | 6  | 1.98453    | 15721.09 | 12419.6611 | 3301.4289  | 3.76190476 |
| 27 | 56.7  | 28  | 21 | 7  | 3          | 14884.94 | 11610.2532 | 3274.6868  | 3.54545455 |
| 35 | 41.2  | 25  | 24 | 1  | 3.11562    | 22746.41 | 21381.6254 | 1364.7846  | 5.66666667 |
| 21 | 80.3  | 23  | 19 | 4  | 4.75       | 14872.68 | 12344.3244 | 2528.3556  | 4.88235294 |
| 3  | 122   | 70  | 41 | 29 | 1.4137931  | 41659.88 | 25829.1256 | 15830.7544 | 1.63157895 |
| 12 | 66.5  | 74  | 33 | 41 | 0.80487805 | 31098.33 | 15238.1817 | 15860.1483 | 0.96078431 |
| 18 | 55    | 16  | 12 | 4  | 3          | 21665.44 | 18198.9696 | 3466.4704  | 5.25       |
| 37 | 49.8  | 30  | 28 | 2  | 3.02145    | 16854.61 | 12303.8653 | 4550.7447  | 2.7037037  |
| 14 | 63.5  | 81  | 44 | 37 | 1.18918919 | 18098.12 | 14460.3979 | 3637.72212 | 3.97512438 |
| 26 | 49    | 25  | 19 | 6  | 3.16666667 | 13842.71 | 9828.3241  | 4014.3859  | 2.44827586 |
| 29 | 56.3  | 59  | 41 | 18 | 2.27777778 | 19643.54 | 16893.4444 | 2750.0956  | 6.14285714 |
| 13 | 69.7  | 61  | 28 | 33 | 0.84848485 | 41956.28 | 24334.6424 | 17621.6376 | 1.38095238 |
| 23 | 25.3  | 42  | 34 | 8  | 4.25       | 11984.22 | 10785.798  | 1198.422   | 9          |
| 10 | 59.8  | 50  | 24 | 26 | 0.92307692 | 37201.65 | 16368.726  | 20832.924  | 0.78571429 |
| 28 | 33.2  | 42  | 33 | 9  | 3.66666667 | 10998.42 | 8908.7202  | 2089.6998  | 4.2631579  |
| 50 | 164   | 32  | 13 | 19 | 0.68421053 | 30184.99 | 13583.2455 | 16601.7445 | 0.81818182 |
| 1  | 60.5  | 56  | 32 | 24 | 1.33333333 | 36188.27 | 20265.4312 | 15922.8388 | 1.27272727 |
| 15 | 129   | 70  | 31 | 39 | 0.79487179 | 36894.21 | 18816.0471 | 18078.1629 | 1.04081633 |
| 51 | 283   | 23  | 14 | 9  | 1.55555556 | 45297.54 | 24007.6962 | 21289.8438 | 1.12765957 |
| 17 | 48.5  | 42  | 18 | 24 | 0.75       | 32551.32 | 20181.8184 | 12369.5016 | 1.63157895 |
| 6  | 74.2  | 103 | 48 | 55 | 0.87272727 | 36541.23 | 19366.8519 | 17174.3781 | 1.12765957 |
| 55 | 301   | 65  | 36 | 29 | 1.24137931 | 41095.25 | 18081.91   | 23013.34   | 0.78571429 |

|    |      |    |    |    |            |          |            |            |            |
|----|------|----|----|----|------------|----------|------------|------------|------------|
| 39 | 39.8 | 25 | 14 | 11 | 1.27272727 | 42954.95 | 35223.059  | 7731.891   | 4.55555556 |
| 31 | 76   | 20 | 17 | 3  | 2.9512     | 21894.82 | 17077.9596 | 4816.8604  | 3.54545455 |
| 52 | 198  | 64 | 28 | 36 | 0.77777778 | 40998.3  | 23779.014  | 17219.286  | 1.38095238 |
| 46 | 187  | 44 | 25 | 19 | 1.31578947 | 34982.8  | 15742.26   | 19240.54   | 0.81818182 |
| 11 | 71.6 | 93 | 51 | 42 | 1.21428571 | 44942.66 | 26516.1694 | 18426.4906 | 1.43902439 |
| 33 | 62.8 | 35 | 29 | 6  | 3.5214     | 13942.84 | 10596.5584 | 3346.2816  | 3.16666667 |
| 38 | 275  | 29 | 28 | 1  | 2.88451    | 42549.42 | 23402.181  | 9147.239   | 1.22222222 |
| 34 | 49.8 | 30 | 22 | 8  | 4.6462     | 14972.58 | 11828.3382 | 3144.2418  | 3.76190476 |
| 24 | 47.2 | 27 | 16 | 11 | 1.45454545 | 16287.94 | 11727.3168 | 4560.6232  | 2.57142857 |
| 54 | 275  | 76 | 44 | 32 | 1.375      | 37625.52 | 19189.0152 | 18436.5048 | 1.04081633 |
| 43 | 257  | 37 | 16 | 21 | 0.76190476 | 42984.5  | 25360.855  | 17623.645  | 1.43902439 |
| 25 | 21.3 | 18 | 11 | 7  | 1.57142857 | 17295.88 | 12798.9512 | 4496.9288  | 2.84615385 |
| 9  | 61.2 | 72 | 39 | 33 | 1.18181818 | 35981.24 | 19070.0572 | 16911.1828 | 1.12765957 |
| 41 | 220  | 31 | 17 | 14 | 1.21428571 | 40341.56 | 22187.858  | 18153.702  | 1.22222222 |
| 8  | 66.7 | 39 | 18 | 21 | 0.85714286 | 39287.25 | 24358.095  | 14929.155  | 1.63157895 |
| 2  | 28.3 | 53 | 35 | 18 | 1.94444444 | 21695.56 | 11281.6912 | 10413.8688 | 1.08333333 |
| 48 | 202  | 44 | 23 | 21 | 1.0952381  | 39421.84 | 21287.7936 | 18134.0464 | 1.17391304 |
| 49 | 187  | 53 | 31 | 22 | 1.40909091 | 36084.22 | 21289.6898 | 14794.5302 | 1.43902439 |
| 40 | 45.9 | 24 | 15 | 9  | 1.66666667 | 19051.61 | 13717.1592 | 5334.4508  | 2.57142857 |
| 47 | 238  | 39 | 21 | 18 | 1.16666667 | 40854.35 | 20835.7185 | 20018.6315 | 1.04081633 |
| 53 | 213  | 52 | 33 | 19 | 1.73684211 | 42958.42 | 23627.131  | 19331.289  | 1.22222222 |
| 22 | 95.4 | 32 | 27 | 5  | 5.4        | 22705.95 | 16348.284  | 6357.666   | 2.57142857 |

Columns: 1) Cell Number, 2) Primary Apical Dendrite Length, 3) Secondary Branch Total, 4) Secondary Branch Total SR, 5) Secondary Branch Total SLM, 6) SR/SLM Secondary Branch Ratio, 7) Total Apical Dendrite Area, 8) SR Apical Dendrite Area, 9) SLM Apical Dendrite Area, 10) SR/SLM Apical Dendrite Area Ratio
